# Supplementary material for: Cancer cell–induced neutrophil extracellular traps promote both hypercoagulability and cancer progression
Source: PubMed Central journal article supplement (PMC6488070; doi:10.1371/journal.pone.0216055), 2019-04-29
Supplement: pone.0216055.s002.pdf [file pone.0216055.s002.pdf]

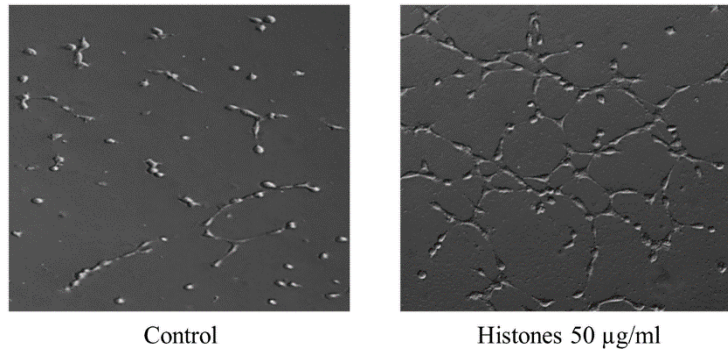

**S2 Fig. The black and white image that NETs induce endothelial cells EA.hy926 angiogenesis.** Endothelial cells EA.hy926 were incubated with or without histones (50 µg/mL) for 4 h in a Matrigel-coated well and then histones significantly increased the endothelial tubule formation. The capillary-like structures were taken under an optical microscope ( $\times 100$ ).
